# Supplementary material
Source: HighWire-hosted journal article supplement (https://bmjopen.bmj.com/content/13/7/e067239)
Supplement: inline-supplementary-material-1 [file inline-supplementary-material-1.pdf]

## Supplementary 1: Interview guides for Qualitative interview

### **Interview guide at post-intervention (T<sub>1</sub>)**

#### **1. Perceived experiences of the dyadic expressive arts-based group**

- Could you share your experiences in the 8-week dyadic expressive arts-based group intervention?

#### **2. Perceived changes after participating in the dyadic expressive arts-based group**

- How do you perceive/are there any changes in the following aspects?
  - ❖ Your child's behaviour
  - ❖ Your psychological condition
  - ❖ Caregiving experience
  - ❖ Relationship with your child

#### **3. Possible reasons for the perceived changes**

- (If the mother experienced changes) Are there any possible reasons for the previously mentioned changes?
- (If the mother experienced no change) Why do you think there are no changes?

#### **4. Closing**

- Do you have anything else that you would like to share?

\*The interview will not be limited to the above questions. The interviewer may slightly adjust the interview guide based on the sharing of each interviewee.

### **Interview guide at 6-month post-intervention (T3)**

#### **1. Current situation of the mother-child dyad**

- How have you and your child been in these six months?

#### **2. Perceived changes six months after participating in the dyadic expressive arts-based group**

- How do you perceive/are there any changes in the following aspects?
  - ❖ Your child's behaviour
  - ❖ Your psychological condition
  - ❖ Caregiving experience
  - ❖ Relationship with your child

#### **3. Possible reasons for the perceived changes**

- (If the mother experienced changes) Are there any possible reasons for the previously mentioned changes?
- (If the mother experienced no change) Why do you think there are no changes?

#### **4. Closing**

- Do you have anything else that you would like to share?

\*The interview will not be limited to the above questions. The interviewer may slightly adjust the interview guide based on the sharing of each interviewee.
